# Supplementary material for: Formation of hydroperoxo (–OOH) species on the surface of self-doped Bi2.15WO6: reactivity towards As(iii) oxidation
Source: Royal Society of Chemistry journal article supplement (doi:10.1039/d0cp00569j), 2020-01-01
Supplement: d0cp00569j1.pdf [file d0cp00569j1.pdf]

## Electronic Supplementary Information (ESI):

# Formation of Hydroperoxo (-OOH) Species on the Surface of Self-Doped $\text{Bi}_{2.15}\text{WO}_6$ : Reactivity toward As(III) Oxidation

*Xiang-Ming Wang<sup>†</sup>, Song-Hai Wu<sup>†</sup>, Hai-Tao Ren<sup>\*§</sup>, Peng-Yue Zhu<sup>#</sup>, Cong Wang<sup>†</sup>,  
Yong Liu<sup>‡</sup>, Shi-Wei Sun<sup>†</sup>, Xiao-Cong Zhang<sup>†</sup>, Yi-Ying Lin<sup>†</sup>, Zi-He Meng<sup>†</sup>, Shao-Yi Jia<sup>†</sup>  
and Xu Han<sup>\*//</sup>*

<sup>†</sup> School of Chemical Engineering and Technology, Tianjin University, Tianjin, PR China

<sup>§</sup> School of Textile Science and Engineering, Tiangong University, Tianjin, PR China

<sup>#</sup> School of Environmental Science and Engineering, Tianjin University, Tianjin, PR China

<sup>‡</sup> School of Chemistry and Chemical Engineering, Tianjin University of Technology, Tianjin, PR China

<sup>//</sup> Key Lab of Indoor Air Environment Quality Control, School of Environmental Science and Engineering, Tianjin University, Tianjin, PR China

\*Corresponding Author

Telephone: +86-13920241918

E-mail address: [renhaitao@tjpu.edu.cn](mailto:renhaitao@tjpu.edu.cn)

Telephone: +86-15222072695

F-mail address: [xuhan@tju.edu.cn](mailto:xuhan@tju.edu.cn)



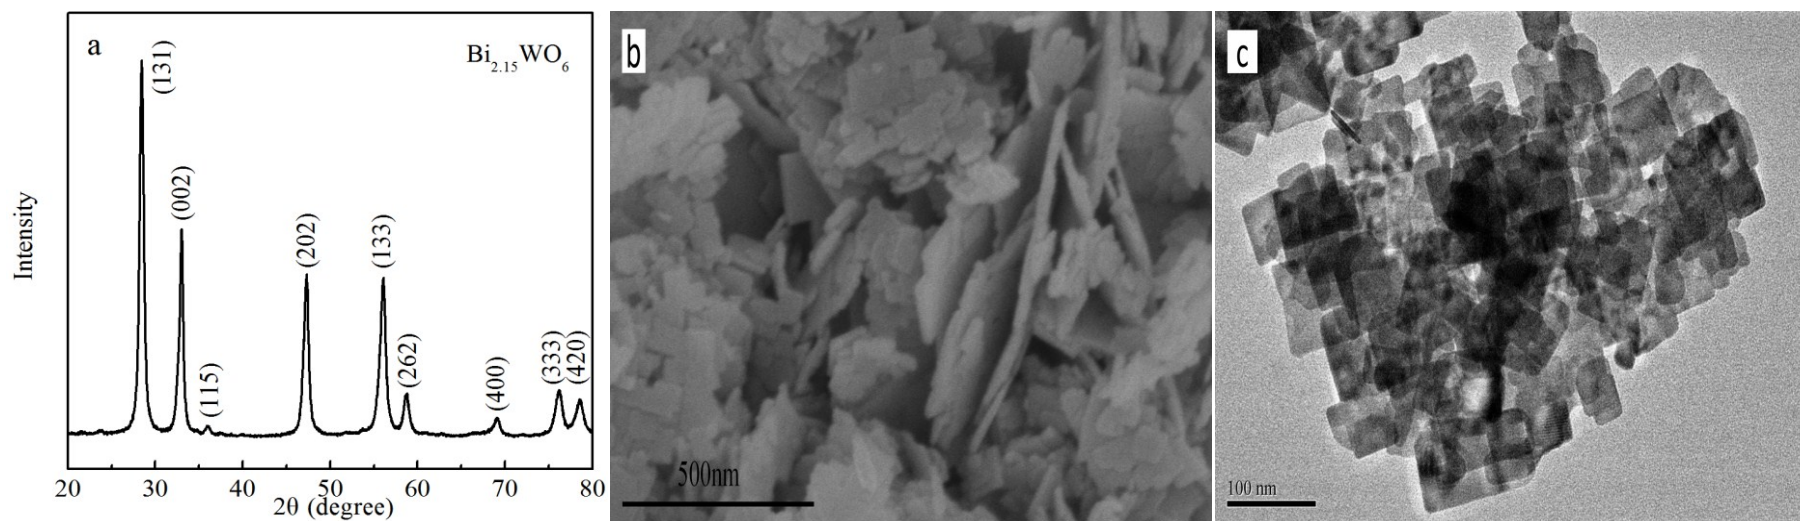

**Fig. S1** (a) XRD pattern, (b) SEM image and (c) TEM image of  $\text{Bi}_{2.15}\text{WO}_6$ .

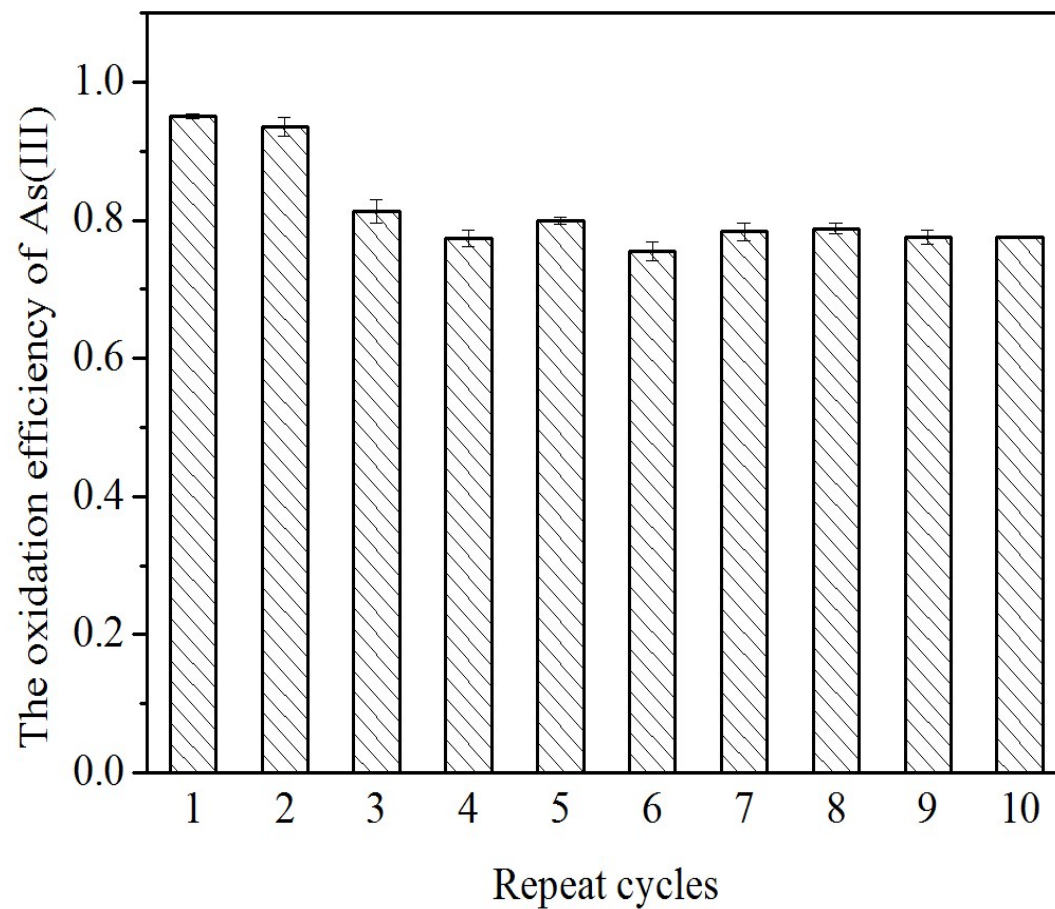

**Fig. S2** Recycling runs in the photocatalytic oxidation of As(III) over the  $\text{Bi}_{2.15}\text{WO}_6$  system under visible light at pH 11.6. Conditions:  $0.4 \text{ g L}^{-1}$   $\text{Bi}_{2.15}\text{WO}_6$  at pH 11.6

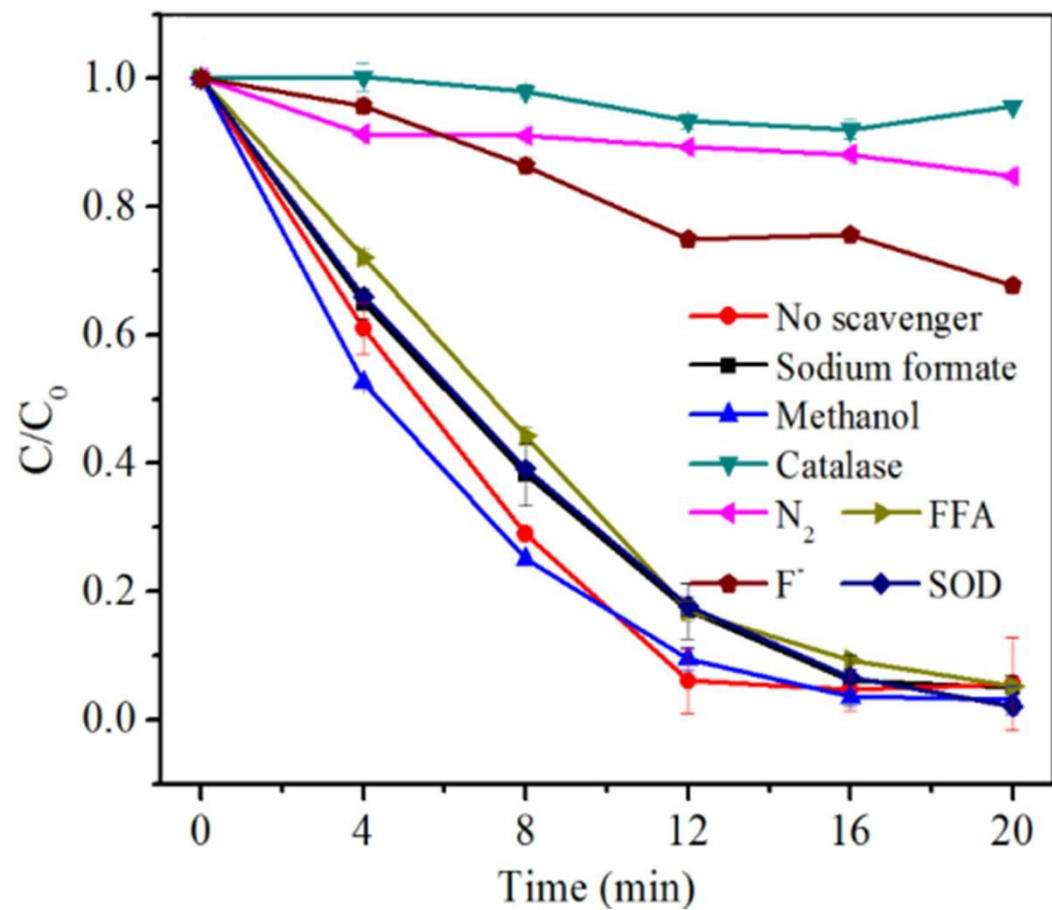

**Fig. S3** Quenching experiments in the oxidation of As(III) by  $\text{Bi}_{2.15}\text{WO}_6$  under visible light. Conditions:  $0.4 \text{ g L}^{-1}$   $\text{Bi}_{2.15}\text{WO}_6$  and  $20 \text{ mg L}^{-1}$  As(III) at pH 11.6.

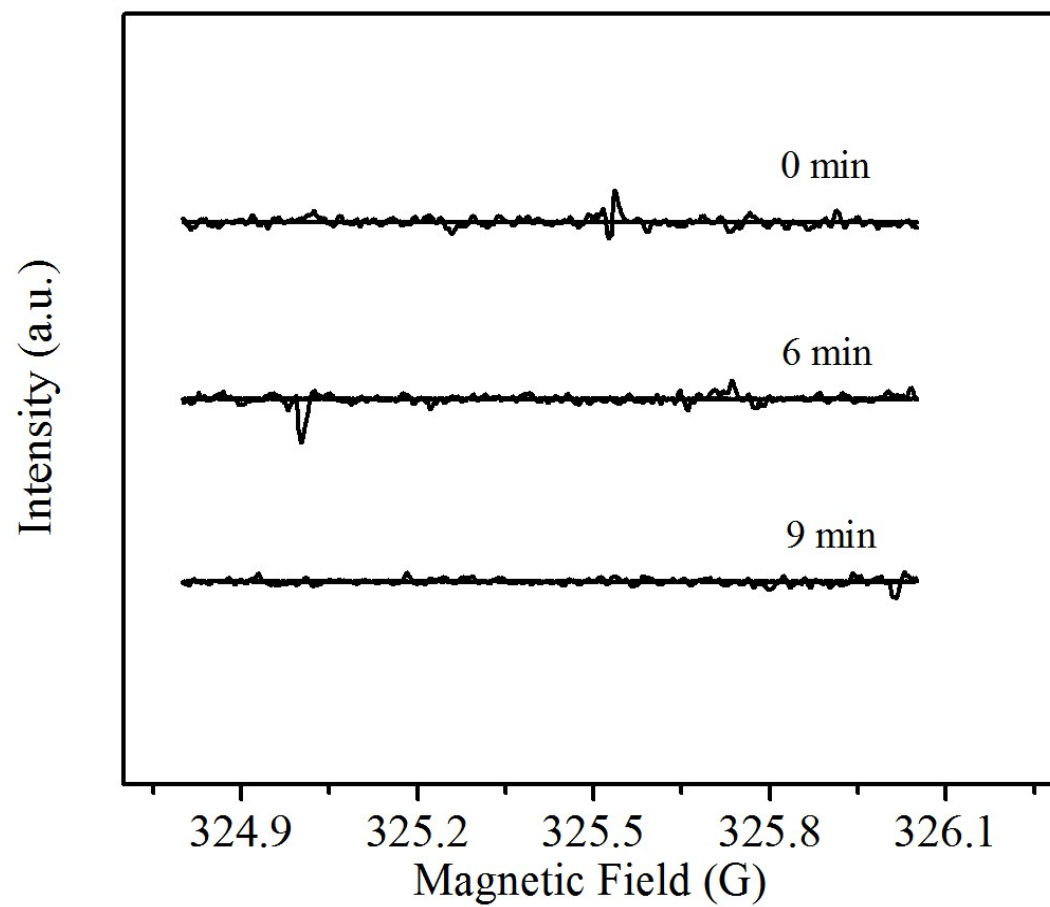

**Fig. S4** ESR spectra for  $\text{Bi}_{2.15}\text{WO}_6$  at pH 11.6 under visible light in 1.0 M methanol solution.
